# Supplementary material for: Dual interaction of scaffold protein Tim44 of mitochondrial import motor with channel-forming translocase subunit Tim23
Source: eLife. 2017 Apr 25;6:e23609. doi: 10.7554/eLife.23609 (PMC5422074; doi:10.7554/eLife.23609)
Supplement: Figure 1—source data 1. — This data set relates to Figure 1G. DOI: http://dx.doi.org/10.7554/eLife.23609.003 [file elife-23609-fig1-data1.xlsx]

## Sheet: Sheet1
raw data	Tim44 WT	D345G	D345A	D345K
Tim23	9880	9470	9467	9968
Tim44	6047	4176	6506	3092
Pam18	7156	4444	6193	3012
Pam16	2094	1075	2111	1028
Tim17	11427	12078	12071	12388
Pam17	1423	1937	1315	2820
raw data	Tim44 WT	D345G	D345A	D345K
Tim17	100	105.697	105.636	108.41
Tim44	100	69.059	107.591	51.1328
Pam18	100	62.1017	86.5428	42.0906
Pam16	100	51.3372	100.812	49.0926
Pam17	100	136.121	92.4104	198.173
raw data	Tim44 WT	D345G	D345A	D345K
Tim23	10308	9873	10345	11154
Tim44	6242	4380	6124	2881
Pam18	6956	4641	6401	3320
Pam16	2283	1475	2010	928
Tim17	10926	11080	11003	12412
Pam17	1236	1845	1355	2516
raw data	Tim44 WT	D345G	D345A	D345K
Tim17	100	101.409	100.705	113.601
Tim44	100	70.1698	98.1096	46.1551
Pam18	100	66.7194	92.0213	47.7286
Pam16	100	64.608	88.042	40.6483
Pam17	100	149.272	109.628	203.56
raw data	Tim44 WT	D345G	D345A	D345K
Tim23	10794.9	9977.66	11036.9	13302.7
Tim44	10047.1	7006.4	11372.4	3608.5
Pam18	10365.2	6453.47	9235.54	4870.3
Pam16	3225.93	2017.45	2874.69	1397.43
Tim17	14455.4	14069.7	13072.4	14562.1
Pam17	4443.41	7231.24	4281.25	9090.14
raw data	Tim44 WT	D345G	D345A	D345K
Tim17	100	97.3321	90.4326	100.738
Tim44	100	69.7353	113.191	35.9157
Pam18	100	62.2606	89.101	46.9868
Pam16	100	62.5384	89.1119	43.3185
Pam17	100	162.741	96.3505	204.576
