# Supplementary material for: Dual interaction of scaffold protein Tim44 of mitochondrial import motor with channel-forming translocase subunit Tim23
Source: eLife. 2017 Apr 25;6:e23609. doi: 10.7554/eLife.23609 (PMC5422074; doi:10.7554/eLife.23609)
Supplement: Figure 2—source data 1. — This data set relates to Figure 2E. DOI: http://dx.doi.org/10.7554/eLife.23609.005 [file elife-23609-fig2-data1.xlsx]

## Sheet: Sheet1
raw data	Tim44 WT	D345A+E295A	D345A+E350A	WT	D345A+E303A
Tim23	9653	9503	9674	8522	9232
Tim44	8844	6592	7033	6499	1675
Pam18	11924	8715	7931	8812	5811
Pam16	8623	6501	6715	3607	1792
Tim17	13041	12952	14026	5231	6102
Pam17	2610	4136	4276	5578	11158
raw data	Tim44 WT	D345A+E295A	D345A+E350A	D345A+E303A
Tim17	100	99.3175	107.553	116.651
Tim44	100	74.5364	79.5228	25.7732
Pam18	100	73.0879	66.5129	65.9442
Pam16	100	75.3914	77.8731	49.6812
Pam17	100	158.467	163.831	200.036
raw data	Tim44 WT	D345A+E295A	D345A+E350A	WT	D345A+E303A
Tim23	9457	9693	10757	8316	8876
Tim44	8946	6793	6931	6711	1464
Pam18	10602	8531	8039	9369	5046
Pam16	8519	6329	6265	3381	1489
Tim17	12458	11960	13040	5575	6168
Pam17	3189	5809	5785	6212	12017
raw data	Tim44 WT	D345A+E295A	D345A+E350A	D345A+E303A
Tim17	100	96.0026	104.672	110.637
Tim44	100	75.9334	77.476	21.8149
Pam18	100	80.4659	75.8253	53.8585
Pam16	100	74.2928	73.5415	44.0402
Pam17	100	182.157	181.405	193.448
raw data	Tim44 WT	D345A+E295A	D345A+E350A	WT	D345A+E303A
Tim23	13896.8	15352.3	15933.8	20482.1	20888.4
Tim44	23968	17439.8	16498.3	17314.8	7680.18
Pam18	16443.9	14403.3	12199.3	20212.6	15821.5
Pam16	16928.1	14581	13263	13677.8	7580.25
Tim17	16960.9	17324.3	17478	8684.83	9371.49
Pam17	443.849	758.163	755.577	632.724	1291.92
raw data	Tim44 WT	D345A+E295A	D345A+E350A	D345A+E303A
Tim17	100	102.143	103.049	107.906
Tim44	100	72.7628	68.835	44.3562
Pam18	100	87.5906	74.1877	78.2751
Pam16	100	86.1348	78.3489	55.4202
Pam17	100	170.816	170.233	204.184
