# Supplementary material for: Dual interaction of scaffold protein Tim44 of mitochondrial import motor with channel-forming translocase subunit Tim23
Source: eLife. 2017 Apr 25;6:e23609. doi: 10.7554/eLife.23609 (PMC5422074; doi:10.7554/eLife.23609)
Supplement: Figure 5—source data 1. — This data set relates to Figure 5C. DOI: http://dx.doi.org/10.7554/eLife.23609.011 [file elife-23609-fig5-data1.xlsx]

## Sheet: Sheet1
raw data	Tim44 WT	D345K	D345K+G173V
Tim23	13762	13822	14957
Tim17	18663	18524	17893
Tim44	6239	2654	4681
Pam18	5396	2491	5026
Pam16	2041	1025	1902
Pam17	9074	14948	11725
raw data	Tim44 WT	D345K	D345K+G173V
Tim17	100	99.2552	95.8742
Tim44	100	42.5389	75.028
Pam18	100	46.1638	93.1431
Pam16	100	50.2205	93.1896
Pam17	100	164.734	129.215
raw data	Tim44 WT	D345K	D345K+G173V
Tim23	14747	13532	15008
Tim17	19191	18115	18097
Tim44	6138	2796	4286
Pam18	5710	2360	4747
Pam16	1878	806	1570
Pam17	13411	22124	16554
raw data	Tim44 WT	D345K	D345K+G173V
Tim17	100	94.3932	94.2994
Tim44	100	45.5523	69.8273
Pam18	100	41.331	83.1349
Pam16	100	42.918	83.5996
Pam17	100	164.969	123.436
raw data	Tim44 WT	D345K	D345K+G173V
Tim23	8071.4	7648.98	6977.86
Tim17	7848.97	6994.02	8362.39
Tim44	13851.4	5573.64	9506.56
Pam18	14363.6	7710.27	12497.4
Pam16	4452.61	2238.69	3581.76
Pam17	10365.6	16594	12195.5
raw data	Tim44 WT	D345K	D345K+G173V
Tim17	100	89.1075	106.541
Tim44	100	40.2388	68.6324
Pam18	100	53.6794	87.0078
Pam16	100	50.2782	80.4418
Pam17	100	160.087	117.653
