# Supplementary material for: Dual interaction of scaffold protein Tim44 of mitochondrial import motor with channel-forming translocase subunit Tim23
Source: eLife. 2017 Apr 25;6:e23609. doi: 10.7554/eLife.23609 (PMC5422074; doi:10.7554/eLife.23609)
Supplement: Figure 7—source data 1. — This data set relates to Figure 7A. DOI: http://dx.doi.org/10.7554/eLife.23609.014 [file elife-23609-fig7-data1.xlsx]

## Sheet: Sheet1
	IUPred	Metadisorder	PrDOS
43	0.671	0.906	0.94
44	0.6482	0.904	0.94
45	0.6755	0.899	0.93
46	0.6906	0.897	0.86
47	0.5533	0.893	0.76
48	0.562	0.89	0.7
49	0.5665	0.815	0.49
50	0.5951	0.799	0.46
51	0.5055	0.726	0.41
52	0.5296	0.704	0.37
53	0.5382	0.625	0.32
54	0.5456	0.618	0.28
55	0.5533	0.556	0.25
56	0.562	0.549	0.23
57	0.4831	0.542	0.22
58	0.4582	0.534	0.21
59	0.4652	0.51	0.21
60	0.4801	0.518	0.21
61	0.3872	0.577	0.23
62	0.4369	0.595	0.25
63	0.4256	0.6	0.28
64	0.4256	0.615	0.31
65	0.5098	0.618	0.33
66	0.5098	0.735	0.35
67	0.4864	0.613	0.37
68	0.4831	0.61	0.39
69	0.5707	0.744	0.39
70	0.5707	0.751	0.4
71	0.5098	0.751	0.4
72	0.5055	0.752	0.41
73	0.6043	0.759	0.42
74	0.5901	0.759	0.43
75	0.6043	0.755	0.45
76	0.5901	0.817	0.48
77	0.5017	0.813	0.52
78	0.4864	0.813	0.54
79	0.5419	0.822	0.57
80	0.5139	0.822	0.58
81	0.5055	0.817	0.58
82	0.494	0.816	0.58
83	0.5456	0.822	0.58
84	0.4831	0.809	0.58
85	0.4256	0.753	0.57
86	0.4801	0.761	0.57
87	0.4541	0.753	0.57
88	0.4582	0.753	0.57
89	0.4766	0.747	0.56
90	0.4831	0.75	0.55
91	0.4801	0.747	0.54
92	0.4901	0.624	0.52
93	0.4901	0.747	0.52
94	0.4441	0.62	0.52
95	0.4409	0.604	0.52
96	0.4369	0.601	0.54
97	0.433	0.604	0.57
98	0.3948	0.601	0.59
99	0.4507	0.612	0.62
100	0.4541	0.615	0.63
101	0.4619	0.615	0.64
102	0.4801	0.617	0.63
103	0.4864	0.615	0.6
104	0.4831	0.609	0.57
105	0.4831	0.61	0.55
106	0.562	0.683	0.49
107	0.662	0.745	0.47
108	0.5901	0.742	0.46
109	0.5901	0.756	0.45
110	0.5807	0.751	0.45
111	0.5707	0.746	0.46
112	0.5493	0.743	0.46
113	0.4685	0.737	0.48
114	0.4725	0.741	0.49
115	0.5296	0.747	0.49
116	0.5901	0.698	0.51
117	0.5176	0.685	0.49
118	0.5254	0.685	0.48
119	0.5176	0.564	0.46
120	0.6043	0.753	0.45
121	0.6136	0.754	0.44
122	0.6183	0.751	0.43
123	0.6089	0.751	0.43
124	0.5854	0.749	0.44
125	0.5577	0.746	0.45
126	0.5382	0.807	0.46
127	0.5342	0.814	0.48
128	0.5296	0.814	0.53
129	0.4901	0.807	0.55
130	0.5493	0.817	0.56
131	0.562	0.765	0.56
132	0.494	0.765	0.58
133	0.5017	0.766	0.59
134	0.5211	0.763	0.6
135	0.6136	0.78	0.61
136	0.5098	0.769	0.62
137	0.5139	0.77	0.63
138	0.5456	0.767	0.63
139	0.5577	0.773	0.63
140	0.5533	0.822	0.63
141	0.5707	0.822	0.63
142	0.5533	0.822	0.61
143	0.5456	0.822	0.6
144	0.4801	0.814	0.58
145	0.4186	0.683	0.57
146	0.4292	0.676	0.56
147	0.4507	0.604	0.54
148	0.4149	0.598	0.53
149	0.433	0.599	0.52
150	0.433	0.593	0.48
151	0.4051	0.601	0.46
152	0.3494	0.597	0.45
153	0.3566	0.584	0.43
154	0.4149	0.589	0.42
155	0.4149	0.591	0.41
156	0.4149	0.585	0.41
157	0.4149	0.577	0.41
158	0.4979	0.587	0.4
159	0.494	0.585	0.4
160	0.391	0.583	0.4
161	0.4409	0.594	0.41
162	0.4441	0.602	0.42
163	0.3529	0.603	0.45
164	0.2918	0.607	0.48
165	0.3019	0.62	0.55
166	0.3529	0.757	0.6
167	0.4256	0.778	0.65
168	0.4369	0.798	0.69
169	0.433	0.794	0.71
170	0.4831	0.806	0.71
171	0.422	0.798	0.69
172	0.4119	0.792	0.66
173	0.4619	0.794	0.63
174	0.5342	0.798	0.6
175	0.5342	0.811	0.59
176	0.5342	0.812	0.59
177	0.4652	0.82	0.59
178	0.4441	0.846	0.58
179	0.4409	0.846	0.58
180	0.4441	0.846	0.6
181	0.4369	0.846	0.61
182	0.5098	0.846	0.62
183	0.5211	0.846	0.64
184	0.5211	0.846	0.68
185	0.5992	0.846	0.71
186	0.6183	0.849	0.77
187	0.6043	0.849	0.81
188	0.6089	0.849	0.85
189	0.6183	0.849	0.87
190	0.6183	0.85	0.88
191	0.6183	0.85	0.88
192	0.5901	0.85	0.86
193	0.6755	0.85	0.83
194	0.6906	0.853	0.79
195	0.662	0.853	0.76
196	0.5807	0.862	0.74
197	0.5176	0.862	0.71
198	0.494	0.854	0.7
199	0.5665	0.854	0.68
200	0.6089	0.854	0.67
201	0.5296	0.854	0.65
202	0.5342	0.853	0.63
203	0.5382	0.853	0.61
204	0.5296	0.853	0.57
205	0.5211	0.79	0.52
206	0.5176	0.656	0.47
207	0.4369	0.638	0.44
208	0.4901	0.637	0.41
209	0.4901	0.627	0.38
210	0.4831	0.623	0.36
211	0.4149	0.617	0.35
212	0.4149	0.616	0.35
213	0.4149	0.609	0.35
214	0.3426	0.608	0.35
215	0.3356	0.654	0.35
216	0.3392	0.654	0.33
217	0.3529	0.654	0.33
218	0.4051	0.66	0.32
219	0.4017	0.664	0.31
220	0.3667	0.657	0.29
221	0.3631	0.651	0.28
222	0.3494	0.642	0.27
223	0.4119	0.587	0.26
224	0.3356	0.576	0.27
225	0.3426	0.571	0.27
226	0.346	0.566	0.27
227	0.2715	0.554	0.27
228	0.268	0.484	0.27
229	0.374	0.48	0.27
230	0.3631	0.482	0.28
231	0.2988	0.474	0.28
232	0.2164	0.466	0.28
233	0.2783	0.465	0.28
234	0.2783	0.445	0.28
235	0.2715	0.44	0.29
236	0.3704	0.45	0.29
237	0.3872	0.449	0.29
238	0.4087	0.46	0.28
239	0.3426	0.454	0.27
240	0.268	0.445	0.26
241	0.2645	0.428	0.26
242	0.2609	0.42	0.26
243	0.2292	0.388	0.25
244	0.2292	0.373	0.25
245	0.2258	0.364	0.24
246	0.2193	0.361	0.23
247	0.2193	0.352	0.23
248	0.2364	0.324	0.22
249	0.2988	0.335	0.21
250	0.2436	0.267	0.2
251	0.2328	0.265	0.19
252	0.2399	0.256	0.2
253	0.2164	0.257	0.21
254	0.2064	0.263	0.22
255	0.1791	0.256	0.23
256	0.1791	0.257	0.25
257	0.1852	0.263	0.27
258	0.1852	0.281	0.3
259	0.1731	0.301	0.33
260	0.1476	0.327	0.35
261	0.2094	0.34	0.37
262	0.2129	0.338	0.38
263	0.1969	0.341	0.39
264	0.2541	0.345	0.39
265	0.2849	0.334	0.38
266	0.1914	0.318	0.38
267	0.1942	0.317	0.38
268	0.1914	0.309	0.37
269	0.1611	0.302	0.36
270	0.1554	0.288	0.36
271	0.1823	0.285	0.34
272	0.2436	0.29	0.32
273	0.1501	0.274	0.29
274	0.1476	0.266	0.26
275	0.247	0.268	0.23
276	0.3494	0.282	0.21
277	0.374	0.282	0.2
278	0.268	0.27	0.19
279	0.268	0.274	0.19
280	0.2609	0.267	0.19
281	0.2715	0.265	0.21
282	0.1969	0.262	0.24
283	0.1969	0.269	0.27
284	0.268	0.27	0.29
285	0.2645	0.266	0.31
286	0.1914	0.268	0.32
287	0.1349	0.259	0.33
288	0.247	0.262	0.33
289	0.2609	0.249	0.31
290	0.2575	0.245	0.29
291	0.2034	0.231	0.25
292	0.2094	0.215	0.2
293	0.1583	0.199	0.16
294	0.0985	0.187	0.12
295	0.1206	0.185	0.09
296	0.1184	0.178	0.09
297	0.1092	0.193	0.09
298	0.1092	0.179	0.09
299	0.0734	0.167	0.09
300	0.1298	0.181	0.09
301	0.0851	0.166	0.08
302	0.0518	0.159	0.08
303	0.0473	0.159	0.08
304	0.0734	0.163	0.09
305	0.0414	0.161	0.09
306	0.0209	0.161	0.1
307	0.0334	0.162	0.09
308	0.0592	0.166	0.12
309	0.0734	0.17	0.13
310	0.0734	0.171	0.14
311	0.0356	0.162	0.14
312	0.0646	0.169	0.13
313	0.0704	0.167	0.1
314	0.0398	0.164	0.1
315	0.0398	0.162	0.09
316	0.0568	0.156	0.09
317	0.0888	0.158	0.09
318	0.0967	0.159	0.09
319	0.0929	0.173	0.1
320	0.0531	0.183	0.1
321	0.0414	0.19	0.1
322	0.0414	0.183	0.12
323	0.069	0.174	0.13
324	0.1162	0.186	0.14
325	0.1275	0.179	0.15
326	0.0909	0.179	0.16
327	0.0948	0.189	0.18
328	0.1424	0.197	0.19
329	0.1501	0.199	0.22
330	0.1449	0.202	0.25
331	0.1643	0.211	0.27
332	0.0888	0.21	0.29
333	0.1028	0.219	0.31
334	0.1007	0.217	0.32
335	0.0929	0.214	0.33
336	0.1449	0.222	0.32
337	0.1671	0.215	0.31
338	0.1349	0.205	0.28
339	0.1399	0.2	0.24
340	0.0835	0.184	0.21
341	0.0581	0.179	0.17
342	0.0929	0.177	0.13
343	0.1424	0.175	0.1
344	0.1399	0.177	0.1
345	0.0817	0.171	0.1
346	0.0463	0.168	0.1
347	0.0364	0.168	0.12
348	0.0662	0.167	0.14
349	0.1137	0.173	0.18
350	0.1424	0.184	0.22
351	0.0835	0.181	0.25
352	0.0985	0.185	0.27
353	0.0676	0.186	0.28
354	0.0676	0.199	0.28
355	0.0749	0.259	0.28
356	0.0454	0.266	0.27
357	0.078	0.267	0.24
358	0.0568	0.287	0.2
359	0.0555	0.302	0.14
360	0.0704	0.258	0.1
361	0.0676	0.234	0.08
362	0.1206	0.231	0.07
363	0.1092	0.227	0.05
364	0.1184	0.224	0.04
365	0.0851	0.216	0.03
366	0.0543	0.155	0.02
367	0.087	0.156	0.02
368	0.1323	0.179	0.02
369	0.1476	0.166	0.02
370	0.1229	0.166	0.03
371	0.1206	0.17	0.04
372	0.1137	0.177	0.05
373	0.1881	0.2	0.06
374	0.1028	0.196	0.07
375	0.1275	0.266	0.08
376	0.1671	0.286	0.09
377	0.2224	0.3	0.1
378	0.3019	0.318	0.15
379	0.3117	0.332	0.19
380	0.3356	0.354	0.22
381	0.3494	0.358	0.24
382	0.2988	0.369	0.25
383	0.2094	0.409	0.24
384	0.1611	0.397	0.23
385	0.2364	0.412	0.22
386	0.2224	0.402	0.21
387	0.2224	0.342	0.2
388	0.2783	0.356	0.18
389	0.247	0.331	0.17
390	0.1914	0.339	0.15
391	0.1184	0.324	0.15
392	0.1275	0.316	0.14
393	0.1206	0.242	0.12
394	0.1275	0.231	0.1
395	0.1399	0.224	0.1
396	0.2224	0.231	0.09
397	0.2609	0.238	0.09
398	0.2064	0.237	0.09
399	0.2164	0.242	0.09
400	0.2193	0.236	0.09
401	0.2193	0.238	0.1
402	0.2609	0.25	0.1
403	0.2541	0.26	0.14
404	0.3529	0.29	0.19
405	0.4369	0.325	0.23
406	0.391	0.372	0.26
407	0.3807	0.398	0.31
408	0.3019	0.402	0.34
409	0.3053	0.437	0.36
410	0.3494	0.45	0.36
411	0.2884	0.433	0.35
412	0.2884	0.416	0.33
413	0.384	0.419	0.28
414	0.3807	0.401	0.24
415	0.384	0.381	0.2
416	0.374	0.361	0.16
417	0.3392	0.353	0.14
418	0.3321	0.325	0.13
419	0.2258	0.292	0.13
420	0.3182	0.316	0.16
421	0.3019	0.342	0.21
422	0.268	0.421	0.28
423	0.2328	0.441	0.37
424	0.1914	0.472	0.45
425	0.1611	0.513	0.54
426	0.1206	0.642	0.68
427	0.0948	0.683	0.77
428	0.1476	0.843	0.8
429	0.1275	0.85	0.78
430	0.1969	0.871	0.75
431	0.2988	0.903	0.89
