# Supplementary material for: Dual interaction of scaffold protein Tim44 of mitochondrial import motor with channel-forming translocase subunit Tim23
Source: eLife. 2017 Apr 25;6:e23609. doi: 10.7554/eLife.23609 (PMC5422074; doi:10.7554/eLife.23609)
Supplement: Figure 7—source data 2. — This data set relates to Figure 7C. DOI: http://dx.doi.org/10.7554/eLife.23609.015 [file elife-23609-fig7-data2.xlsx]

## Sheet: Sheet1
'Tim44 1_1_c0'_CD_ME_X	'Tim44 1_1_c0'_CD_ME
340	90.5832
339	-2.53384
338	21.5372
337	-241.344
336	-162.796
335	-1.90036
334	-62.078
333	-144.426
332	-69.046
331	-77.9142
330	-112.754
329	9.5018
328	-114.021
327	13.9359
326	-141.259
325	-193.835
324	-53.8432
323	-17.1031
322	5.0676
321	175.465
320	0
319	29.1386
318	-13.3024
317	-12.669
316	-31.6724
315	-111.487
314	-8.23484
313	12.0356
312	212.839
311	103.252
310	-42.4411
309	-38.6404
308	-41.8076
307	-8.23484
306	32.3059
305	-64.6118
304	-42.4411
303	-164.697
302	-38.6404
301	40.5406
300	-34.2062
299	-81.0814
298	134.925
297	-119.088
296	-114.021
295	-34.2062
294	-57.0103
293	72.2132
292	3.16724
291	-166.597
290	-127.957
289	-15.2027
288	-62.7114
287	15.8362
286	-217.273
285	138.725
284	-4.4342
283	-47.5087
282	-16.4697
281	-57.6438
280	-166.597
279	28.5052
278	5.0676
277	-93.7504
276	16.4697
275	69.046
274	-122.256
273	-32.9393
272	-126.69
271	-6.96796
270	-29.7721
269	-28.5052
268	82.3483
267	-105.786
266	44.9748
265	-137.458
264	205.871
263	-210.938
262	-189.401
261	29.7721
260	65.8786
259	143.793
258	11.4021
257	39.9072
256	-38.6404
255	-5.701
254	2.53376
253	112.754
252	112.12
251	110.854
250	58.9107
249	84.8822
248	-63.9783
247	217.273
246	-124.156
245	-212.205
244	-448.482
243	-104.519
242	-517.528
241	-417.443
240	-796.878
239	-960.308
238	-1344.81
237	-1566.52
236	-2200.6
235	-2671.25
234	-2987.98
233	-3545.41
232	-4292.88
231	-4906.69
230	-5386.85
229	-5765.65
228	-6646.14
227	-7181.41
226	-7640.02
225	-7942.18
224	-8400.16
223	-8379.26
222	-8538.25
221	-8448.3
220	-8988
219	-8403.33
218	-7860.46
217	-8428.03
216	-8746.02
215	-8229.13
214	-7809.79
213	-8975.33
212	-9738.64
211	-9972.38
210	-10978.3
209	-11572.5
208	-12604.4
207	-12523.3
206	-13553.9
205	-12812.1
204	-13788.9
203	-12881.2
202	-11807.5
201	-11231.7
200	-9712.67
'Tim44 1_1 20_c0'_CD_ME_X	'Tim44 1_1 20_c0'_CD_ME
340	57.0103
339	-41.8077
338	118.455
337	-200.803
336	-148.227
335	0.633478
334	2.53376
333	-11.4021
332	-74.1136
331	-14.5693
330	-88.6828
329	41.1742
328	-147.594
327	-100.718
326	-86.149
325	-116.554
324	-130.49
323	-7.60136
322	25.9714
321	99.4515
320	-80.448
319	-6.33448
318	-35.4731
317	34.2062
316	-78.5476
315	-86.149
314	-74.747
313	-10.7686
312	175.465
311	103.252
310	-14.5693
309	10.1351
308	-120.989
307	-67.1456
306	52.5762
305	-129.857
304	-84.2487
303	110.22
302	-143.793
301	58.9107
300	-29.1386
299	-105.152
298	64.6118
297	35.4731
296	-133.658
295	-36.74
294	98.1846
293	48.7756
292	-4.43412
291	-76.0138
290	-122.889
289	-235.643
288	-96.2842
287	-32.9394
286	-115.288
285	70.9462
284	-0.633478
283	-48.7756
282	-103.886
281	-119.088
280	-46.2417
279	52.5762
278	-97.551
277	58.2773
276	10.7687
275	17.1032
274	-68.4125
273	-13.9358
272	-136.825
271	-185.601
270	28.5052
269	-95.0173
268	87.4159
267	-115.288
266	-53.8431
265	-212.839
264	8.86832
263	-17.1032
262	-319.892
261	-176.732
260	29.1386
259	-88.6829
258	-140.626
257	-74.747
256	57.0104
255	-48.7756
254	-60.1776
253	155.828
252	-13.3024
251	136.825
250	23.4376
249	18.37
248	-1.26688
247	76.0138
246	-116.555
245	-361.699
244	-427.578
243	-394.639
242	-399.706
241	-532.73
240	-842.487
239	-928.002
238	-1335.31
237	-1583.62
236	-1800.89
235	-2398.24
234	-2749.8
233	-2972.77
232	-3543.51
231	-3960.32
230	-4533.59
229	-4664.08
228	-5243.05
227	-5347.57
226	-5922.11
225	-6312.32
224	-6625.87
223	-6617
222	-7057.25
221	-6820.34
220	-6956.53
219	-6817.81
218	-6687.95
217	-6730.39
216	-6999.61
215	-6830.48
214	-7160.5
213	-7295.43
212	-7909.24
211	-8502.15
210	-8870.18
209	-10427.2
208	-11296.9
207	-11034.7
206	-12577.1
205	-12660.7
204	-13014.2
203	-12279.4
202	-12088.1
201	-11267.2
200	-10412.6
'Tim44 1_1 37_c0_s1'_CD_ME_X	'Tim44 1_1 37_c0_s1'_CD_ME
300	239.444
299	-176.732
298	-116.555
297	51.3093
296	-82.3483
295	-237.543
294	170.398
293	130.49
292	-132.391
291	-127.323
290	-55.11
289	-257.814
288	7.60144
287	-31.039
286	-21.5373
285	207.771
284	189.401
283	-193.202
282	96.2842
281	-306.589
280	-154.561
279	24.7044
278	-159.629
277	89.3163
276	22.1707
275	-133.658
274	-86.7824
273	-81.7148
272	-126.69
271	-21.5373
270	-108.953
269	-90.5832
268	98.818
267	-38.007
266	-216.006
265	-179.899
264	-28.5052
263	-35.4731
262	-139.359
261	-387.037
260	-23.4376
259	-115.288
258	-143.793
257	-67.1456
256	-68.4124
255	-95.0173
254	-138.092
253	-109.587
252	42.4411
251	1.90036
250	17.1031
249	122.256
248	136.191
247	-19.6369
246	-389.571
245	-623.313
244	-502.325
243	-213.472
242	-342.696
241	-509.926
240	-1008.45
239	-1146.54
238	-1547.51
237	-1430.96
236	-1709.68
235	-2016.27
234	-2248.74
233	-2674.42
232	-3118.47
231	-2983.54
230	-3615.09
229	-3651.83
228	-4168.09
227	-4590.6
226	-4430.34
225	-4911.76
224	-4982.71
223	-5039.08
222	-5373.54
221	-4913.66
220	-5674.43
219	-5237.35
218	-5505.3
217	-5424.85
216	-5949.98
215	-5823.93
214	-6083.64
213	-6554.29
212	-6924.86
211	-7418.95
210	-8539.52
209	-9110.26
208	-10043.3
207	-9493.49
206	-11393.8
205	-11204.4
204	-12656.3
203	-12693.7
202	-12002.6
201	-11162.6
200	-10503.8
'Tim44 1_1 4 return_c0_s1'_CD_ME_X	'Tim44 1_1 4 return_c0_s1'_CD_ME
300	26.6049
299	157.729
298	83.6152
297	153.295
296	54.4766
295	-46.2417
294	-57.0103
293	119.722
292	-69.0459
291	-144.426
290	-148.86
289	-174.832
288	-6.33448
287	67.1455
286	-28.5052
285	-2.53376
284	-139.992
283	-233.743
282	42.4411
281	-24.071
280	-64.6118
279	-143.159
278	-209.671
277	-37.3735
276	106.419
275	-39.2738
274	-160.263
273	-200.803
272	12.0355
271	-81.7149
270	-9.50172
269	95.0173
268	44.9748
267	-87.4159
266	-131.757
265	-297.721
264	-48.1421
263	108.32
262	-248.312
261	-148.86
260	-105.786
259	226.141
258	-130.49
257	188.768
256	-172.931
255	-84.8821
254	-60.8111
253	140.626
252	52.5763
251	-84.2486
250	172.931
249	-13.3024
248	-101.985
247	25.9714
246	-240.077
245	-302.155
244	-353.464
243	-194.469
242	-465.585
241	-591.008
240	-748.103
239	-1095.23
238	-1457.57
237	-1565.89
236	-2152.46
235	-2845.45
234	-2724.46
233	-3092.5
232	-4441.74
231	-4862.35
230	-5392.55
229	-5936.05
228	-6751.3
227	-6786.77
226	-7918.11
225	-8173.39
224	-8620.6
223	-8413.46
222	-8507.85
221	-8197.46
220	-9062.12
219	-8569.29
218	-8294.38
217	-8787.83
216	-8596.53
215	-8683.31
214	-8203.16
213	-8911.36
212	-9132.43
211	-9841.89
210	-11406.5
209	-11645.3
208	-12627.2
207	-12848.9
206	-13512.1
205	-12782.4
204	-13204.2
203	-13340.4
202	-12073.5
201	-11109.4
200	-10046.5
'Tim44 1_1 50_c0_s1'_CD_ME_X	'Tim44 1_1 50_c0_s1'_CD_ME
300	-155.828
299	-47.5087
298	164.063
297	100.718
296	-239.444
295	0.633478
294	-4.43412
293	62.078
292	25.9714
291	-14.5693
290	-5.701
289	25.338
288	57.6439
287	-1.26696
286	-103.252
285	-27.8718
284	-167.864
283	-77.9142
282	89.3163
281	-61.4445
280	-60.1776
279	199.536
278	-193.202
277	86.149
276	-65.2452
275	-12.0355
274	232.476
273	8.86832
272	-202.07
271	6.33448
270	-70.9462
269	-76.6473
268	-83.6152
267	29.1386
266	84.2487
265	32.9393
264	-145.06
263	165.33
262	-307.223
261	-229.942
260	-103.886
259	77.9141
258	72.8466
257	110.853
256	105.786
255	-241.344
254	-141.259
253	-63.9783
252	-210.305
251	194.469
250	95.6508
249	29.7721
248	-312.924
247	112.754
246	-384.503
245	-438.98
244	-454.816
243	-516.261
242	-568.203
241	-519.428
240	-778.508
239	-1148.44
238	-1523.44
237	-1614.03
236	-1619.73
235	-1961.16
234	-2250.64
233	-2320.32
232	-2896.76
231	-2636.41
230	-3145.07
229	-3001.91
228	-3518.81
227	-3774.72
226	-4162.39
225	-4468.98
224	-4538.03
223	-4294.15
222	-4774.3
221	-4486.08
220	-4996.64
219	-4648.88
218	-4455.04
217	-4826.88
216	-5092.29
215	-5200.61
214	-5061.25
213	-5120.8
212	-6182.46
211	-6653.11
210	-6601.17
209	-8849.28
208	-9260.38
207	-9704.43
206	-10149.1
205	-11070.1
204	-11516.1
203	-12282.6
202	-9713.3
201	-11948.7
200	-10368.3
'Tim44 1_1 80_c0_s1'_CD_ME_X	'Tim44 1_1 80_c0_s1'_CD_ME
300	-49.409
299	-8.23484
298	61.4445
297	116.555
296	-195.736
295	-148.227
294	-31.0389
293	230.575
292	-124.789
291	-323.059
290	-99.4514
289	22.8042
288	-115.288
287	200.803
286	-117.188
285	-148.227
284	-177.366
283	-62.078
282	186.234
281	-97.5511
280	-375.635
279	161.529
278	-177.999
277	90.5832
276	175.465
275	-226.775
274	36.1066
273	19.6369
272	-34.2062
271	134.925
270	36.1065
269	-41.1741
268	54.4766
267	-82.3483
266	46.2418
265	-4.4342
264	56.3769
263	-58.9108
262	-202.704
261	-371.834
260	-189.401
259	-32.9394
258	-110.854
257	183.067
256	-120.989
255	-12.0356
254	-231.209
253	-259.081
252	64.6118
251	-148.227
250	-250.846
249	-206.504
248	-270.483
247	-310.39
246	-668.288
245	-551.1
244	-646.751
243	-521.328
242	-696.794
241	-849.455
240	-1047.09
239	-1145.28
238	-1484.17
237	-1511.41
236	-1766.05
235	-2013.73
234	-1815.46
233	-2237.97
232	-2506.56
231	-2449.55
230	-2962.64
229	-2666.19
228	-3493.47
227	-3124.8
226	-3668.3
225	-3775.99
224	-3784.22
223	-4178.23
222	-4342.29
221	-3820.96
220	-4562.73
219	-4080.68
218	-3985.03
217	-4546.89
216	-4629.88
215	-4501.29
214	-4202.3
213	-4845.88
212	-5008.68
211	-5785.92
210	-5964.55
209	-7442.39
208	-7971.32
207	-7602.02
206	-8934.16
205	-8759.33
204	-10063.6
203	-11018.8
202	-12222.4
201	-8327.95
200	-11480
'Tim44 1_1_c0'_CD_SM_X	'Tim44 1_1_c0'_CD_SM
340	17.5308
339.647	6.96092
339.293	-3.52245
338.94	-13.8329
338.586	-23.881
338.233	-33.57
337.88	-42.8017
337.526	-51.4506
337.173	-59.35
336.82	-66.3342
336.466	-72.3403
336.113	-77.4051
335.759	-81.5748
335.406	-84.9532
335.053	-87.6801
334.699	-89.8854
334.346	-91.633
333.992	-92.9614
333.639	-93.9023
333.286	-94.4635
332.932	-94.6467
332.579	-94.4702
332.226	-93.9896
331.872	-93.2654
331.519	-92.3469
331.165	-91.2671
330.812	-90.0573
330.459	-88.7414
330.105	-87.3363
329.752	-85.8602
329.398	-84.3498
329.045	-82.852
328.692	-81.402
328.338	-79.9638
327.985	-78.4757
327.632	-76.8837
327.278	-75.1617
326.925	-73.2898
326.571	-71.2176
326.218	-68.83
325.865	-66.0043
325.511	-62.653
325.158	-58.7368
324.805	-54.2244
324.451	-49.1675
324.098	-43.6899
323.744	-37.9188
323.391	-31.9898
323.038	-26.0429
322.684	-20.2172
322.331	-14.6451
321.977	-9.45716
321.624	-4.78005
321.271	-0.728972
320.917	2.58374
320.564	5.10834
320.211	6.92211
319.857	8.11762
319.504	8.78362
319.15	9.00399
318.797	8.86304
318.444	8.45756
318.09	7.89465
317.737	7.28001
317.383	6.70414
317.03	6.2496
316.677	5.99606
316.323	6.00841
315.97	6.3468
315.617	7.06181
315.263	8.17439
314.91	9.69934
314.556	11.6059
314.203	13.7763
313.85	16.0824
313.496	18.3842
313.143	20.5273
312.789	22.3559
312.436	23.7085
312.083	24.4189
311.729	24.3375
311.376	23.4525
311.023	21.8201
310.669	19.5101
310.316	16.6562
309.962	13.4117
309.609	9.91474
309.256	6.25979
308.902	2.53334
308.549	-1.19478
308.195	-4.88473
307.842	-8.50047
307.489	-12.0243
307.135	-15.4598
306.782	-18.811
306.429	-22.0769
306.075	-25.2519
305.722	-28.3251
305.368	-31.2423
305.015	-33.9293
304.662	-36.317
304.308	-38.3603
303.955	-40.0212
303.602	-41.2623
303.248	-42.048
302.895	-42.344
302.541	-42.1661
302.188	-41.6157
301.835	-40.8025
301.481	-39.8348
301.128	-38.8195
300.774	-37.8592
300.421	-37.0044
300.068	-36.2689
299.714	-35.6658
299.361	-35.2067
299.008	-34.9025
298.654	-34.7728
298.301	-34.8734
297.947	-35.2698
297.594	-35.9771
297.241	-36.8802
296.887	-37.8439
296.534	-38.7679
296.18	-39.6078
295.827	-40.3261
295.474	-40.9269
295.12	-41.4564
294.767	-41.9627
294.414	-42.4888
294.06	-43.0742
293.707	-43.7603
293.353	-44.5987
293	-45.6453
292.647	-46.9328
292.293	-48.4011
291.94	-49.9664
291.586	-51.5289
291.233	-52.9484
290.88	-54.0796
290.526	-54.8275
290.173	-55.1733
289.82	-55.1063
289.466	-54.6577
289.113	-53.8996
288.759	-52.9031
288.406	-51.7131
288.053	-50.3579
287.699	-48.8674
287.346	-47.2807
286.992	-45.6409
286.639	-43.9782
286.286	-42.2742
285.932	-40.4993
285.579	-38.682
285.226	-36.9829
284.872	-35.5793
284.519	-34.5683
284.165	-33.9309
283.812	-33.6386
283.459	-33.6453
283.105	-33.8891
282.752	-34.3086
282.398	-34.8515
282.045	-35.4713
281.692	-36.119
281.338	-36.7309
280.985	-37.2379
280.632	-37.5755
280.278	-37.6953
279.925	-37.5525
279.571	-37.1469
279.218	-36.5738
278.865	-35.9403
278.511	-35.3226
278.158	-34.7547
277.805	-34.2666
277.451	-33.8641
277.098	-33.5323
276.744	-33.26
276.391	-33.0789
276.038	-33.0445
275.684	-33.2055
275.331	-33.5721
274.977	-34.1414
274.624	-34.8861
274.271	-35.6979
273.917	-36.4519
273.564	-37.0545
273.211	-37.4747
272.857	-37.6892
272.504	-37.6725
272.15	-37.3959
271.797	-36.8339
271.444	-36.0167
271.09	-35.0201
270.737	-33.9187
270.383	-32.7676
270.03	-31.611
269.677	-30.4929
269.323	-29.456
268.97	-28.5424
268.617	-27.7943
268.263	-27.2538
267.91	-26.9626
267.556	-26.9211
267.203	-27.0508
266.85	-27.2657
266.496	-27.5197
266.143	-27.8155
265.789	-28.1558
265.436	-28.4968
265.083	-28.759
264.729	-28.8714
264.376	-28.8424
264.023	-28.7197
263.669	-28.5134
263.316	-28.0494
262.962	-27.0982
262.609	-25.4791
262.256	-23.1539
261.902	-20.1111
261.549	-16.4055
261.195	-12.2116
260.842	-7.71558
260.489	-3.08309
260.135	1.54434
259.782	6.02934
259.429	10.2751
259.075	14.2149
258.722	17.7948
258.368	21.0565
258.015	24.0859
257.662	26.9672
257.308	29.7743
256.955	32.5781
256.602	35.4521
256.248	38.4752
255.895	41.7274
255.541	45.2557
255.188	49.052
254.835	53.1011
254.481	57.3574
254.128	61.7414
253.774	66.169
253.421	70.5157
253.068	74.629
252.714	78.3598
252.361	81.5869
252.008	84.2016
251.654	86.1001
251.301	87.2008
250.947	87.4279
250.594	86.7125
250.241	85.0036
249.887	82.253
249.534	78.402
249.18	73.3751
248.827	67.0958
248.474	59.4957
248.12	50.5146
247.767	40.0865
247.414	28.0705
247.06	14.2762
246.707	-1.46444
246.353	-19.1638
246	-38.7699
245.647	-60.2476
245.293	-83.6291
244.94	-108.963
244.586	-136.333
244.233	-165.903
243.88	-197.852
243.526	-232.473
243.173	-270.239
242.82	-311.632
242.466	-357.024
242.113	-406.689
241.759	-460.898
241.406	-519.989
241.053	-584.339
240.699	-654.305
240.346	-730.108
239.992	-811.916
239.639	-899.896
239.286	-994.203
238.932	-1094.99
238.579	-1202.37
238.226	-1316.38
237.872	-1437.02
237.519	-1564.3
237.165	-1698.18
236.812	-1838.61
236.459	-1985.43
236.105	-2138.38
235.752	-2297.17
235.398	-2461.56
235.045	-2631.29
234.692	-2806.1
234.338	-2985.76
233.985	-3170.03
233.632	-3358.65
233.278	-3551.2
232.925	-3747.25
232.571	-3946.31
232.218	-4147.75
231.865	-4350.95
231.511	-4555.3
231.158	-4760.19
230.805	-4965.01
230.451	-5169.2
230.098	-5372.22
229.744	-5573.52
229.391	-5772.53
229.038	-5968.67
228.684	-6161.32
228.331	-6349.67
227.977	-6532.89
227.624	-6710.14
227.271	-6880.7
226.917	-7043.87
226.564	-7199
226.211	-7345.58
225.857	-7483.12
225.504	-7611.22
225.15	-7729.63
224.797	-7838.1
224.444	-7936.51
224.09	-8024.78
223.737	-8102.91
223.383	-8171.11
223.03	-8229.76
222.677	-8279.25
222.323	-8320.07
221.97	-8352.77
221.617	-8377.94
221.263	-8396.3
220.91	-8408.62
220.556	-8415.67
220.203	-8418.26
219.85	-8417.21
219.496	-8413.64
219.143	-8409
218.789	-8404.79
218.436	-8402.48
218.083	-8403.55
217.729	-8409.45
217.376	-8421.2
217.023	-8439.65
216.669	-8465.62
216.316	-8499.95
215.962	-8543.45
215.609	-8597.01
215.256	-8661.66
214.902	-8738.46
214.549	-8828.29
214.195	-8931.69
213.842	-9049.11
213.489	-9180.41
213.135	-9324.72
212.782	-9481.1
212.429	-9648.36
212.075	-9825.11
211.722	-10009.9
211.368	-10201.4
211.015	-10397.8
210.662	-10597.7
210.308	-10799.1
209.955	-10999.9
209.602	-11198
209.248	-11391.5
208.895	-11578.2
208.541	-11756.1
208.188	-11923.3
207.835	-12077.7
207.481	-12217.7
207.128	-12342
206.774	-12449.3
206.421	-12538.4
206.068	-12608.3
205.714	-12657.8
205.361	-12686.7
205.008	-12695
204.654	-12682.6
204.301	-12649.6
203.947	-12596.3
203.594	-12523
203.241	-12431.1
202.887	-12322.3
202.534	-12198.1
202.18	-12060.8
201.827	-11912.4
201.474	-11755.1
201.12	-11590.7
200.767	-11421.2
200.414	-11248.3
200.06	-11073.5
199.707	-10898.4
199.353	-10724.7
199	-10553.9
'Tim44 1_1 20_c0'_CD_SM_X	'Tim44 1_1 20_c0'_CD_SM
340	23.8861
339.647	14.7156
339.293	5.66294
338.94	-3.15384
338.586	-11.6546
338.233	-19.8508
337.88	-27.764
337.526	-35.2239
337.173	-41.7687
336.82	-46.9245
336.466	-50.4877
336.113	-52.5179
335.759	-53.1032
335.406	-52.5294
335.053	-51.2046
334.699	-49.5201
334.346	-47.7482
333.992	-46.1153
333.639	-44.817
333.286	-43.9333
332.932	-43.5169
332.579	-43.5888
332.226	-44.0975
331.872	-44.9823
331.519	-46.2231
331.165	-47.8588
330.812	-49.9299
330.459	-52.4159
330.105	-55.2405
329.752	-58.332
329.398	-61.6871
329.045	-65.3429
328.692	-69.2947
328.338	-73.2897
327.985	-76.9843
327.632	-80.0825
327.278	-82.4559
326.925	-84.0129
326.571	-84.6797
326.218	-84.4202
325.865	-83.2032
325.511	-81.0011
325.158	-77.7907
324.805	-73.5534
324.451	-68.3443
324.098	-62.2829
323.744	-55.5065
323.391	-48.3022
323.038	-41.0402
322.684	-34.0776
322.331	-27.695
321.977	-22.1472
321.624	-17.6541
321.271	-14.3214
320.917	-12.2302
320.564	-11.3402
320.211	-11.3642
319.857	-11.9878
319.504	-12.999
319.15	-14.3169
318.797	-15.8685
318.444	-17.5646
318.09	-19.3028
317.737	-20.984
317.383	-22.5436
317.03	-23.9344
316.677	-25.0832
316.323	-25.78
315.97	-25.7705
315.617	-24.8403
315.263	-22.899
314.91	-19.881
314.556	-15.7947
314.203	-10.7904
313.85	-5.03781
313.496	1.19035
313.143	7.49587
312.789	13.4704
312.436	18.6659
312.083	22.6037
311.729	24.8446
311.376	25.2847
311.023	23.9852
310.669	21.0471
310.316	16.7589
309.962	11.4656
309.609	5.49113
309.256	-0.903012
308.902	-7.46632
308.549	-13.9296
308.195	-19.9899
307.842	-25.3459
307.489	-29.8516
307.135	-33.5395
306.782	-36.4563
306.429	-38.7121
306.075	-40.4635
305.722	-41.8411
305.368	-42.7674
305.015	-43.068
304.662	-42.6134
304.308	-41.4795
303.955	-39.8006
303.602	-37.7485
303.248	-35.5974
302.895	-33.6368
302.541	-31.978
302.188	-30.4279
301.835	-28.771
301.481	-26.9783
301.128	-25.2239
300.774	-23.6791
300.421	-22.3489
300.068	-21.1221
299.714	-19.8881
299.361	-18.5549
299.008	-17.0383
298.654	-15.3035
298.301	-13.5249
297.947	-11.9322
297.594	-10.6868
297.241	-9.77345
296.887	-9.14791
296.534	-8.70835
296.18	-8.26025
295.827	-7.60946
295.474	-6.77333
295.12	-5.98669
294.767	-5.49958
294.414	-5.62496
294.06	-6.71716
293.707	-9.09554
293.353	-12.8396
293	-17.93
292.647	-24.3075
292.293	-31.7544
291.94	-40.0135
291.586	-48.7952
291.233	-57.7325
290.88	-66.4468
290.526	-74.5763
290.173	-81.7846
289.82	-87.7403
289.466	-92.178
289.113	-94.8961
288.759	-95.7218
288.406	-94.7729
288.053	-92.3474
287.699	-88.7475
287.346	-84.2856
286.992	-79.278
286.639	-74.0119
286.286	-68.6639
285.932	-63.3852
285.579	-58.3772
285.226	-53.9561
284.872	-50.4508
284.519	-48.0202
284.165	-46.5789
283.812	-46.0186
283.459	-46.1502
283.105	-46.7099
282.752	-47.4314
282.398	-48.0526
282.045	-48.3134
281.692	-47.9759
281.338	-46.9309
280.985	-45.1164
280.632	-42.52
280.278	-39.3045
279.925	-35.6709
279.571	-31.8307
279.218	-28.0169
278.865	-24.4629
278.511	-21.2893
278.158	-18.464
277.805	-15.9519
277.451	-13.8642
277.098	-12.4393
276.744	-11.9041
276.391	-12.3345
276.038	-13.7232
275.684	-16.0514
275.331	-19.2427
274.977	-23.2007
274.624	-27.8006
274.271	-32.8232
273.917	-38.0297
273.564	-43.2158
273.211	-48.2469
272.857	-52.9953
272.504	-57.2779
272.15	-60.8407
271.797	-63.4333
271.444	-64.9451
271.09	-65.3802
270.737	-64.7755
270.383	-63.4292
270.03	-61.7762
269.677	-60.2114
269.323	-58.9178
268.97	-58.0104
268.617	-57.6321
268.263	-58.0125
267.91	-59.3966
267.556	-61.8635
267.203	-65.1741
266.85	-69.0559
266.496	-73.31
266.143	-77.8269
265.789	-82.4994
265.436	-87.1707
265.083	-91.6457
264.729	-95.7604
264.376	-99.6153
264.023	-103.441
263.669	-107.416
263.316	-111.45
262.962	-115.375
262.609	-118.944
262.256	-121.68
261.902	-123.068
261.549	-122.826
261.195	-121.096
260.842	-118.063
260.489	-114.007
260.135	-109.309
259.782	-104.337
259.429	-99.1949
259.075	-93.788
258.722	-88.0168
258.368	-81.773
258.015	-74.9442
257.662	-67.4523
257.308	-59.3755
256.955	-50.8365
256.602	-41.9773
256.248	-32.9926
255.895	-24.0849
255.541	-15.3533
255.188	-6.72067
254.835	1.90465
254.481	10.5379
254.128	19.1117
253.774	27.5414
253.421	35.5787
253.068	42.8607
252.714	49.0575
252.361	54.091
252.008	57.9936
251.654	60.7582
251.301	62.2086
250.947	62.1235
250.594	60.3482
250.241	56.8996
249.887	51.8213
249.534	45.1181
249.18	36.7324
248.827	26.6
248.474	14.6342
248.12	0.724807
247.767	-15.2385
247.414	-33.3598
247.06	-53.7388
246.707	-76.4297
246.353	-101.183
246	-127.623
245.647	-155.367
245.293	-184.008
244.94	-213.13
244.586	-242.463
244.233	-272.086
243.88	-302.136
243.526	-332.927
243.173	-365.052
242.82	-399.127
242.466	-435.792
242.113	-475.707
241.759	-519.517
241.406	-567.684
241.053	-620.551
240.699	-678.428
240.346	-741.4
239.992	-809.47
239.639	-882.659
239.286	-961.073
238.932	-1044.83
238.579	-1133.97
238.226	-1228.27
237.872	-1327.51
237.519	-1431.52
237.165	-1540.22
236.812	-1653.52
236.459	-1771.33
236.105	-1893.55
235.752	-2020.05
235.398	-2150.4
235.045	-2284.05
234.692	-2420.46
234.338	-2559.33
233.985	-2700.42
233.632	-2843.55
233.278	-2988.67
232.925	-3135.74
232.571	-3284.59
232.218	-3434.77
231.865	-3585.79
231.511	-3737.17
231.158	-3888.46
230.805	-4039.22
230.451	-4189.03
230.098	-4337.46
229.744	-4484.11
229.391	-4628.93
229.038	-4772.05
228.684	-4913.53
228.331	-5053.18
227.977	-5190.67
227.624	-5325.74
227.271	-5458.27
226.917	-5588.17
226.564	-5715.11
226.211	-5838.31
225.857	-5956.92
225.504	-6070.12
225.15	-6177.11
224.797	-6277.1
224.444	-6369.49
224.09	-6453.78
223.737	-6529.56
223.383	-6596.71
223.03	-6655.31
222.677	-6705.4
222.323	-6746.94
221.97	-6779.84
221.617	-6804.23
221.263	-6820.9
220.91	-6830.76
220.556	-6834.73
220.203	-6833.67
219.85	-6828.49
219.496	-6820.27
219.143	-6810.31
218.789	-6799.97
218.436	-6790.58
218.083	-6783.52
217.729	-6780.14
217.376	-6781.57
217.023	-6788.86
216.669	-6803.01
216.316	-6824.89
215.962	-6855.32
215.609	-6895.25
215.256	-6945.96
214.902	-7008.82
214.549	-7084.97
214.195	-7175.24
213.842	-7280.41
213.489	-7401.14
213.135	-7537.98
212.782	-7691.41
212.429	-7861.33
212.075	-8047.23
211.722	-8248.5
211.368	-8464.18
211.015	-8693.08
210.662	-8933.92
210.308	-9184.94
209.955	-9444.27
209.602	-9709.54
209.248	-9977.15
208.895	-10243.3
208.541	-10504.5
208.188	-10757.8
207.835	-11000.3
207.481	-11230
207.128	-11445.2
206.774	-11644.6
206.421	-11825.5
206.068	-11985
205.714	-12120.1
205.361	-12228.9
205.008	-12310.5
204.654	-12363.8
204.301	-12388.7
203.947	-12385.3
203.594	-12354.4
203.241	-12297.9
202.887	-12218.2
202.534	-12117.8
202.18	-11999
201.827	-11864.3
201.474	-11716.5
201.12	-11558.5
200.767	-11393.2
200.414	-11223.3
200.06	-11050.9
199.707	-10878
199.353	-10707
199	-10539.9
'Tim44 1_1 37_c0_s1'_CD_SM_X	'Tim44 1_1 37_c0_s1'_CD_SM
300	39.4335
299.747	30.7324
299.494	22.1801
299.241	13.9251
298.987	6.11632
298.734	-1.1239
298.481	-7.76355
298.228	-13.7902
297.975	-19.1912
297.722	-23.9704
297.469	-28.179
297.216	-31.8774
296.962	-35.1258
296.709	-37.9684
296.456	-40.4082
296.203	-42.4416
295.95	-44.065
295.697	-45.2827
295.444	-46.1175
295.19	-46.5943
294.937	-46.7384
294.684	-46.6199
294.431	-46.3955
294.178	-46.2322
293.925	-46.2961
293.672	-46.6976
293.419	-47.452
293.165	-48.565
292.912	-50.0416
292.659	-51.836
292.406	-53.8263
292.153	-55.8846
291.9	-57.8835
291.647	-59.7186
291.393	-61.3159
291.14	-62.6035
290.887	-63.5098
290.634	-63.985
290.381	-64.0033
290.128	-63.5404
289.875	-62.5718
289.622	-61.0705
289.368	-59.0061
289.115	-56.3485
288.862	-53.0714
288.609	-49.2252
288.356	-44.9279
288.103	-40.3001
287.85	-35.4614
287.596	-30.5127
287.343	-25.5408
287.09	-20.6323
286.837	-15.8738
286.584	-11.3574
286.331	-7.17831
286.078	-3.43201
285.825	-0.214728
285.571	2.36895
285.318	4.20943
285.065	5.19702
284.812	5.23233
284.559	4.30762
284.306	2.46333
284.053	-0.259679
283.799	-3.80882
283.546	-8.04266
283.293	-12.779
283.04	-17.8356
282.787	-23.0427
282.534	-28.3146
282.281	-33.5985
282.028	-38.8419
281.774	-43.9801
281.521	-48.8827
281.268	-53.3961
281.015	-57.3668
280.762	-60.6671
280.509	-63.2919
280.256	-65.2729
280.003	-66.6416
279.749	-67.4404
279.496	-67.7551
279.243	-67.6825
278.99	-67.3198
278.737	-66.7512
278.484	-66.0153
278.231	-65.1407
277.977	-64.1559
277.724	-63.1049
277.471	-62.0781
277.218	-61.1751
276.965	-60.4953
276.712	-60.1109
276.459	-60.0219
276.206	-60.2162
275.952	-60.6819
275.699	-61.3901
275.446	-62.2727
275.193	-63.2563
274.94	-64.2676
274.687	-65.2489
274.434	-66.175
274.18	-67.0239
273.927	-67.7742
273.674	-68.409
273.421	-68.92
273.168	-69.2998
272.915	-69.541
272.662	-69.6397
272.409	-69.5971
272.155	-69.415
271.902	-69.0953
271.649	-68.6575
271.396	-68.1444
271.143	-67.6004
270.89	-67.0693
270.637	-66.5803
270.383	-66.1447
270.13	-65.7728
269.877	-65.4758
269.624	-65.2797
269.371	-65.2264
269.118	-65.3585
268.865	-65.7191
268.612	-66.3605
268.358	-67.3439
268.105	-68.7303
267.852	-70.5769
267.599	-72.8745
267.346	-75.5608
267.093	-78.572
266.84	-81.8429
266.586	-85.291
266.333	-88.8218
266.08	-92.3403
265.827	-95.7565
265.574	-99.0335
265.321	-102.167
265.068	-105.153
264.815	-107.992
264.561	-110.717
264.308	-113.378
264.055	-116.028
263.802	-118.712
263.549	-121.435
263.296	-124.183
263.043	-126.942
262.789	-129.691
262.536	-132.365
262.283	-134.883
262.03	-137.161
261.777	-139.116
261.524	-140.668
261.271	-141.736
261.018	-142.237
260.764	-142.116
260.511	-141.436
260.258	-140.298
260.005	-138.802
259.752	-137.038
259.499	-135.033
259.246	-132.804
258.992	-130.366
258.739	-127.732
258.486	-124.906
258.233	-121.894
257.98	-118.699
257.727	-115.329
257.474	-111.803
257.221	-108.144
256.967	-104.374
256.714	-100.509
256.461	-96.5453
256.208	-92.4784
255.955	-88.302
255.702	-84.0062
255.449	-79.5714
255.195	-74.9765
254.942	-70.2003
254.689	-65.2272
254.436	-60.0524
254.183	-54.6723
253.93	-49.0837
253.677	-43.305
253.424	-37.3937
253.17	-31.4113
252.917	-25.4198
252.664	-19.5033
252.411	-13.7815
252.158	-8.37701
251.905	-3.41218
251.652	1.00476
251.398	4.78516
251.145	7.84178
250.892	10.0873
250.639	11.4321
250.386	11.7837
250.133	11.0493
249.88	9.13642
249.627	5.95479
249.373	1.41675
249.12	-4.56526
248.867	-12.0764
248.614	-21.1542
248.361	-31.7909
248.108	-43.9774
247.855	-57.7001
247.602	-72.8729
247.348	-89.3503
247.095	-106.985
246.842	-125.626
246.589	-145.085
246.336	-165.146
246.083	-185.59
245.83	-206.207
245.576	-226.873
245.323	-247.515
245.07	-268.063
244.817	-288.463
244.564	-308.815
244.311	-329.308
244.058	-350.131
243.805	-371.482
243.551	-393.626
243.298	-416.861
243.045	-441.487
242.792	-467.785
242.539	-495.929
242.286	-526.044
242.033	-558.256
241.779	-592.673
241.526	-629.296
241.273	-668.087
241.02	-709.008
240.767	-752.003
240.514	-796.914
240.261	-843.554
240.008	-891.734
239.754	-941.279
239.501	-992.07
239.248	-1044.01
238.995	-1096.98
238.742	-1150.91
238.489	-1205.71
238.236	-1261.32
237.982	-1317.67
237.729	-1374.74
237.476	-1432.61
237.223	-1491.4
236.97	-1551.2
236.717	-1612.11
236.464	-1674.16
236.211	-1737.38
235.957	-1801.8
235.704	-1867.41
235.451	-1934.2
235.198	-2002.13
234.945	-2071.15
234.692	-2141.24
234.439	-2212.31
234.185	-2284.32
233.932	-2357.19
233.679	-2430.83
233.426	-2505.13
233.173	-2579.94
232.92	-2655.14
232.667	-2730.61
232.414	-2806.25
232.16	-2881.96
231.907	-2957.64
231.654	-3033.24
231.401	-3108.81
231.148	-3184.38
230.895	-3259.99
230.642	-3335.61
230.388	-3411.1
230.135	-3486.32
229.882	-3561.12
229.629	-3635.4
229.376	-3709.09
229.123	-3782.1
228.87	-3854.36
228.617	-3925.73
228.363	-3996.01
228.11	-4065.01
227.857	-4132.54
227.604	-4198.41
227.351	-4262.49
227.098	-4324.64
226.845	-4384.72
226.591	-4442.68
226.338	-4498.57
226.085	-4552.43
225.832	-4604.27
225.579	-4654.09
225.326	-4701.8
225.073	-4747.34
224.82	-4790.66
224.566	-4831.76
224.313	-4870.68
224.06	-4907.47
223.807	-4942.19
223.554	-4974.9
223.301	-5005.7
223.048	-5034.7
222.794	-5061.99
222.541	-5087.65
222.288	-5111.79
222.035	-5134.5
221.782	-5155.9
221.529	-5176.21
221.276	-5195.69
221.023	-5214.63
220.769	-5233.27
220.516	-5251.69
220.263	-5269.94
220.01	-5288.07
219.757	-5306.17
219.504	-5324.51
219.251	-5343.42
218.997	-5363.24
218.744	-5384.29
218.491	-5406.81
218.238	-5431.04
217.985	-5457.24
217.732	-5485.63
217.479	-5516.49
217.226	-5550.09
216.972	-5586.72
216.719	-5626.61
216.466	-5669.95
216.213	-5716.89
215.96	-5767.59
215.707	-5822.23
215.454	-5881.12
215.201	-5944.55
214.947	-6012.81
214.694	-6086.17
214.441	-6164.82
214.188	-6248.92
213.935	-6338.64
213.682	-6434.1
213.429	-6535.3
213.175	-6642.25
212.922	-6754.94
212.669	-6873.33
212.416	-6997.3
212.163	-7126.73
211.91	-7261.48
211.657	-7401.36
211.404	-7546.02
211.15	-7695.14
210.897	-7848.36
210.644	-8005.24
210.391	-8165.17
210.138	-8327.55
209.885	-8491.75
209.632	-8657.21
209.378	-8823.42
209.125	-8989.84
208.872	-9155.96
208.619	-9321.28
208.366	-9485.3
208.113	-9647.52
207.86	-9807.47
207.607	-9964.79
207.353	-10119.2
207.1	-10270.5
206.847	-10418.3
206.594	-10562.2
206.341	-10701.1
206.088	-10834.3
205.835	-10960.9
205.581	-11080.2
205.328	-11191.7
205.075	-11295.1
204.822	-11389.6
204.569	-11475
204.316	-11550.4
204.063	-11615.4
203.81	-11669.5
203.556	-11712.5
203.303	-11744.7
203.05	-11766.3
202.797	-11777.4
202.544	-11778.8
202.291	-11771.4
202.038	-11756
201.784	-11733.5
201.531	-11704.9
201.278	-11671.2
201.025	-11633.6
200.772	-11593.1
200.519	-11550.4
200.266	-11506.2
200.013	-11461.3
199.759	-11416.4
199.506	-11372.1
199.253	-11329.2
199	-11288.4
'Tim44 1_1 4 return_c0_s1'_CD_SM_X	'Tim44 1_1 4 return_c0_s1'_CD_SM
300	106.815
299.747	104.455
299.494	102.036
299.241	99.4971
298.987	96.7797
298.734	93.8328
298.481	90.6355
298.228	87.1732
297.975	83.4318
297.722	79.3966
297.469	75.0531
297.216	70.3869
296.962	65.3834
296.709	60.0442
296.456	54.4128
296.203	48.5395
295.95	42.4744
295.697	36.2699
295.444	29.9836
295.19	23.6735
294.937	17.3977
294.684	11.1992
294.431	5.09109
294.178	-0.916837
293.925	-6.81498
293.672	-12.6071
293.419	-18.3198
293.165	-23.9818
292.912	-29.6213
292.659	-35.2247
292.406	-40.7164
292.153	-46.0159
291.9	-51.0427
291.647	-55.7222
291.393	-59.9883
291.14	-63.7749
290.887	-67.0172
290.634	-69.6762
290.381	-71.743
290.128	-73.21
289.875	-74.0713
289.622	-74.3471
289.368	-74.0847
289.115	-73.3327
288.862	-72.1415
288.609	-70.6
288.356	-68.8312
288.103	-66.9594
287.85	-65.1072
287.596	-63.3735
287.343	-61.8385
287.09	-60.5821
286.837	-59.6798
286.584	-59.1539
286.331	-58.9904
286.078	-59.1744
285.825	-59.6898
285.571	-60.5072
285.318	-61.5889
285.065	-62.8973
284.812	-64.3916
284.559	-66.0035
284.306	-67.6504
284.053	-69.2495
283.799	-70.7223
283.546	-72.0232
283.293	-73.1216
283.04	-73.9871
282.787	-74.6009
282.534	-75.0206
282.281	-75.3342
282.028	-75.6297
281.774	-75.985
281.521	-76.4201
281.268	-76.9356
281.015	-77.5316
280.762	-78.2032
280.509	-78.9187
280.256	-79.6388
280.003	-80.3241
279.749	-80.9334
279.496	-81.4175
279.243	-81.7256
278.99	-81.8064
278.737	-81.6175
278.484	-81.1466
278.231	-80.3884
277.977	-79.3372
277.724	-78.0084
277.471	-76.4811
277.218	-74.8464
276.965	-73.1956
276.712	-71.6134
276.459	-70.167
276.206	-68.921
275.952	-67.9396
275.699	-67.2515
275.446	-66.803
275.193	-66.5292
274.94	-66.3646
274.687	-66.238
274.434	-66.0656
274.18	-65.762
273.927	-65.2423
[truncated: 1,098 more rows]
