# Supplementary material for: Dual interaction of scaffold protein Tim44 of mitochondrial import motor with channel-forming translocase subunit Tim23
Source: eLife journal article supplement (doi:10.7554/elife.23609), 2017-04-25
Supplement: supp [file elife_poa_e23609_Figure_2_Supplement.pdf › elife_poa_e23609_Figure_2_Supplement.pdf]

Figure 2 – supplement 1

Tim44 protein sequence alignment

|                |     |                      |     |  |  |
|----------------|-----|----------------------|-----|--|--|
|                |     | 295                  | 303 |  |  |
| S.cerevisiae   | 290 | TRHLREY-IVPEILEAYVKG | 335 |  |  |
| S.pombe        | 286 | LQYLREY-IVPEVTEAYVKG | 331 |  |  |
| C.elegans      | 287 | WLRFCETKIIPNILEAFIRF | 333 |  |  |
| D.melanogaster | 291 | FLRDCETDIIPNILESIVRG | 337 |  |  |
| M.musculus     | 315 | FLHQCETDIIPNILEAMISG | 361 |  |  |
| H.sapiens      | 315 | FLKQCENDIIPNVLEAMISG | 361 |  |  |
|                |     | 342 345 350          | 370 |  |  |
| S.cerevisiae   | 336 | DVYA-DGRILDIRGVEIVSA | 381 |  |  |
| S.pombe        | 332 | GVVS-VGKILDIRGVDIMS  | 377 |  |  |
| C.elegans      | 334 | HFSTKDSRIIDINKVEMATG | 378 |  |  |
| D.melanogaster | 338 | GVYL-DSKILDINIELAMGK | 380 |  |  |
| M.musculus     | 362 | GFQF-HSRILDISNVDLAMG | 405 |  |  |
| H.sapiens      | 362 | GLQF-HSRILDIDNVDLAMG | 405 |  |  |
