# Supplementary figures and images for: Dual interaction of scaffold protein Tim44 of mitochondrial import motor with channel-forming translocase subunit Tim23
Source: eLife journal article supplement (doi:10.7554/elife.23609), 2017-04-25

Figure 3 – supplement 1

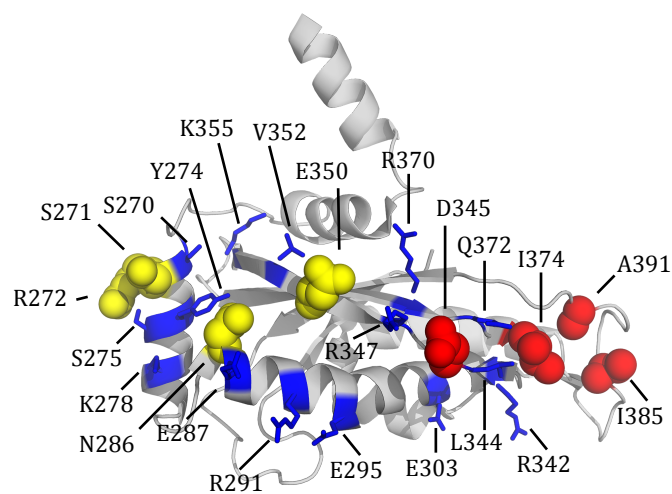

Supplement: supp [file elife_poa_e23609_Figure_3_Supplement.pdf › elife_poa_e23609_Figure_3_Supplement.pdf]
